# Supplementary material for: Overexpression of NANOG in human ES cells enables feeder-free growth while inducing primitive ectoderm features
Source: Oxford University Press journal article supplement (doi:10.1242/dev.02286), 2006-02-24
Supplement: dev02286-supptable.pdf [file dev02286-supptable.pdf]

**Table S1**

| Gene                   | 5' primer             | 3' primer             | Product size (bp) |
|------------------------|-----------------------|-----------------------|-------------------|
| GAPDH                  | AGCCACATCGCTCAGACACC  | GTA CTCAGCGGCCAGCATCG | 302               |
| <i>OCT4</i>            | CTCACCTGGGGGTTCTATT   | CTCCAGGTTGCCTCTCACTC  | 230               |
| <i>NANOG</i>           | CATGAGTGTGGATCCAGCTTG | CCTGAATAAGCAGATCCATGG | 192               |
| <i>NANOG</i> transgene | GCTCTGACTGACCGCGTTAC  | TCACACGTCTTCAGGTTGCAT | 1119              |
| REX1                   | TCACAGTCCAGCAGGTGTTTG | TCTTGTCTTTGCCCGTTTCT  | 205               |
| <i>GBX2</i>            | GTA ACTTCGACAAGGCGGAG | TCAGATTGTCATCCGAGCTG  | 234               |
| <i>FGF5</i>            | AGTCAATGGATCCCACGAAG  | CTTGAAAACGCTCCCTGAAC  | 179               |
| Mouse <i>Gapdh</i>     | GTCAAGGCTGAGAATGGGAAG | CTAAGCAGTTGGTGGTGCAG  | 294               |
| Mouse <i>Oct4</i>      | CACGAGTGGAAAGCAACTCA  | AGATGGTGGTCTGGCTGAAC  | 246               |
| Mouse <i>Rex1</i>      | CAATAGAGTGAGTGTGCAGTG | CCTCGTATGATGCACTCTAG  | 465               |
| Mouse <i>Gbx2</i>      | AGACGGCAAAGCCTTCTTG   | AGCAGTCTGACCAGGCAAAT  | 208               |
| Mouse <i>Crtr1</i>     | AGCCCGAACACTACAACCAG  | AGCCGGATTCATACGACTG   | 217               |
| CRIPTO                 | CGATGCTAACGCCTCTTTTC  | GGCAGCAGGTTCTGTTTAGC  | 289               |
| LEFTYA                 | CTGCACACCCTGGACCTCA   | CGAGGCGATACACTGTCGC   | 248               |
| FST                    | GACTGTGGACCTGGGAAAAA  | GAGCTGCCTGGACAGAAAAC  | 236               |
| TBX1                   | TATGCTGCTCATGGACTTCG  | CCGTTGTCGTCCAGTAGGTT  | 213               |
| GATA6                  | GCCAACTGTCACACCACAAC  | TGGGGGAAGTATTTTTGCTG  | 265               |
| ZNFN1A1                | CCAATGTGCTCATGGTTCAC  | TAGCTTCGGCCACAATATCC  | 244               |
